# Supplementary material for: Transcriptome and Metabolome Analysis of a Late-Senescent Vegetable Soybean during Seed Development Provides New Insights into Degradation of Chlorophyll
Source: MDPI journal article supplement (doi:10.3390/antiox11122480), 2022-12-16
Supplement: s1 [file s1]

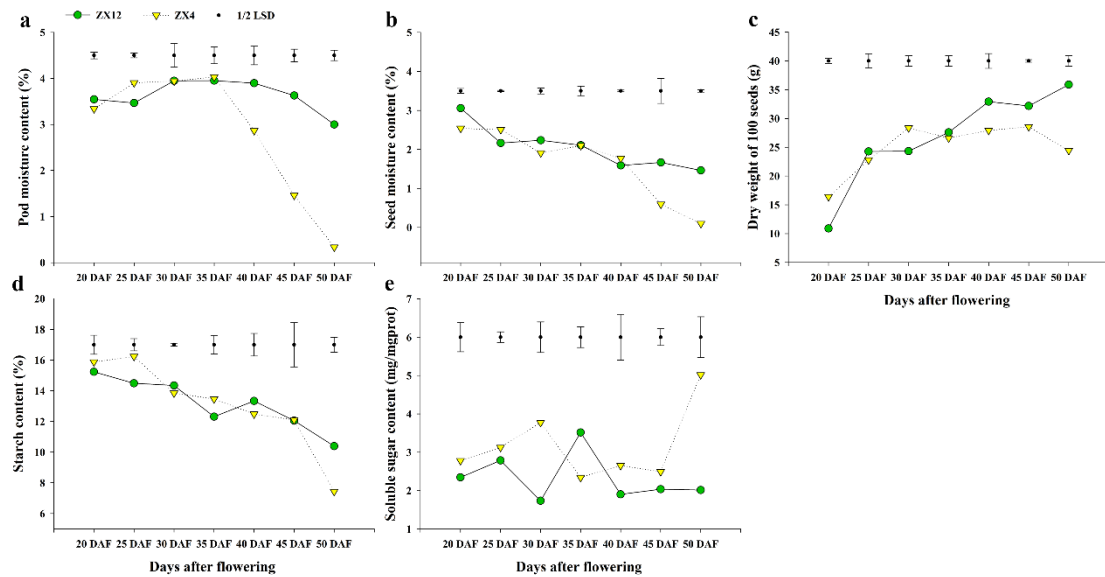

**Fig S1** Seed characters between ZX4 and ZX12 at different maturity stages. a Moisture content of pods. b Moisture content of seeds. c Dry weight of 100 seeds. d Starch content of seeds. e Soluble sugar content of seeds.

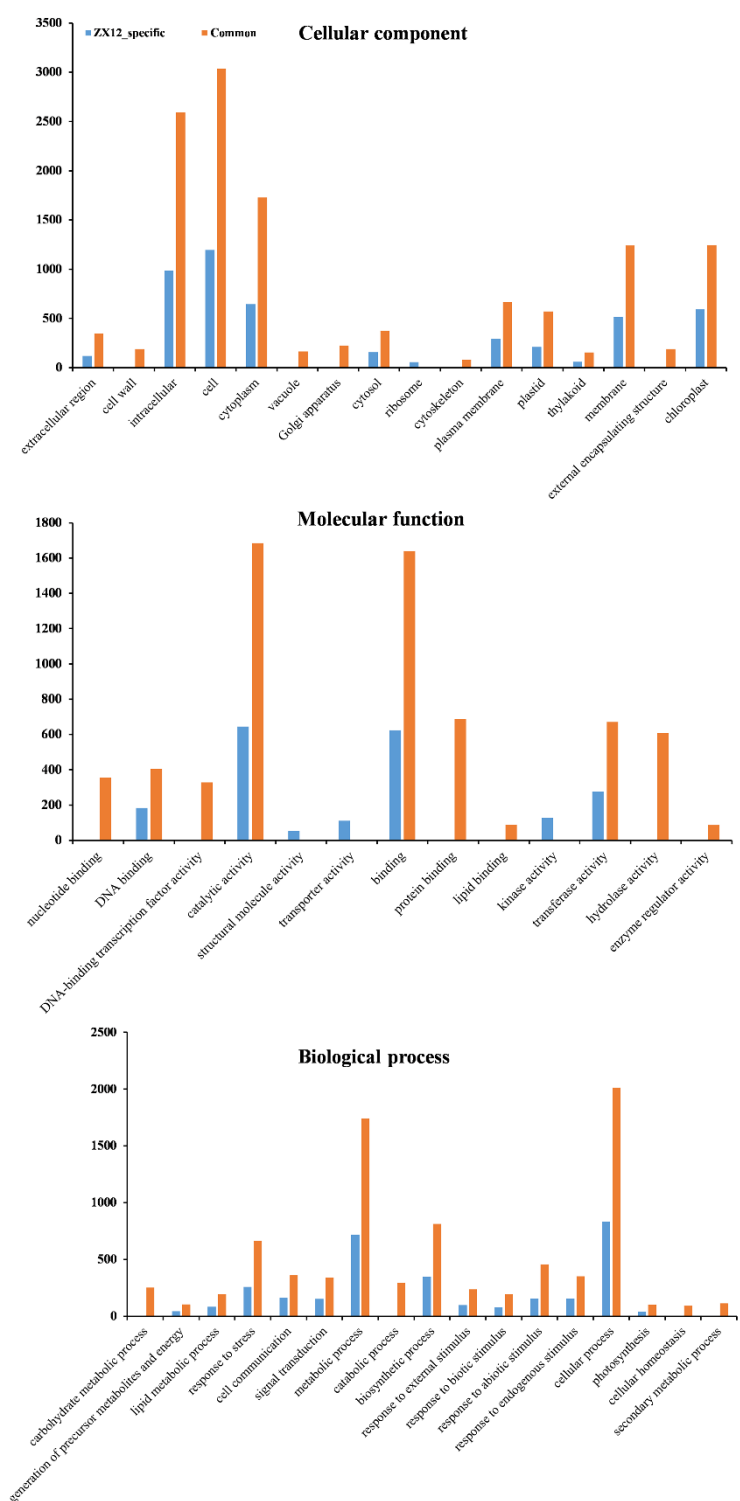

**Fig S2** GO enrichment analysis of differential genes between ZX12 and ZX4

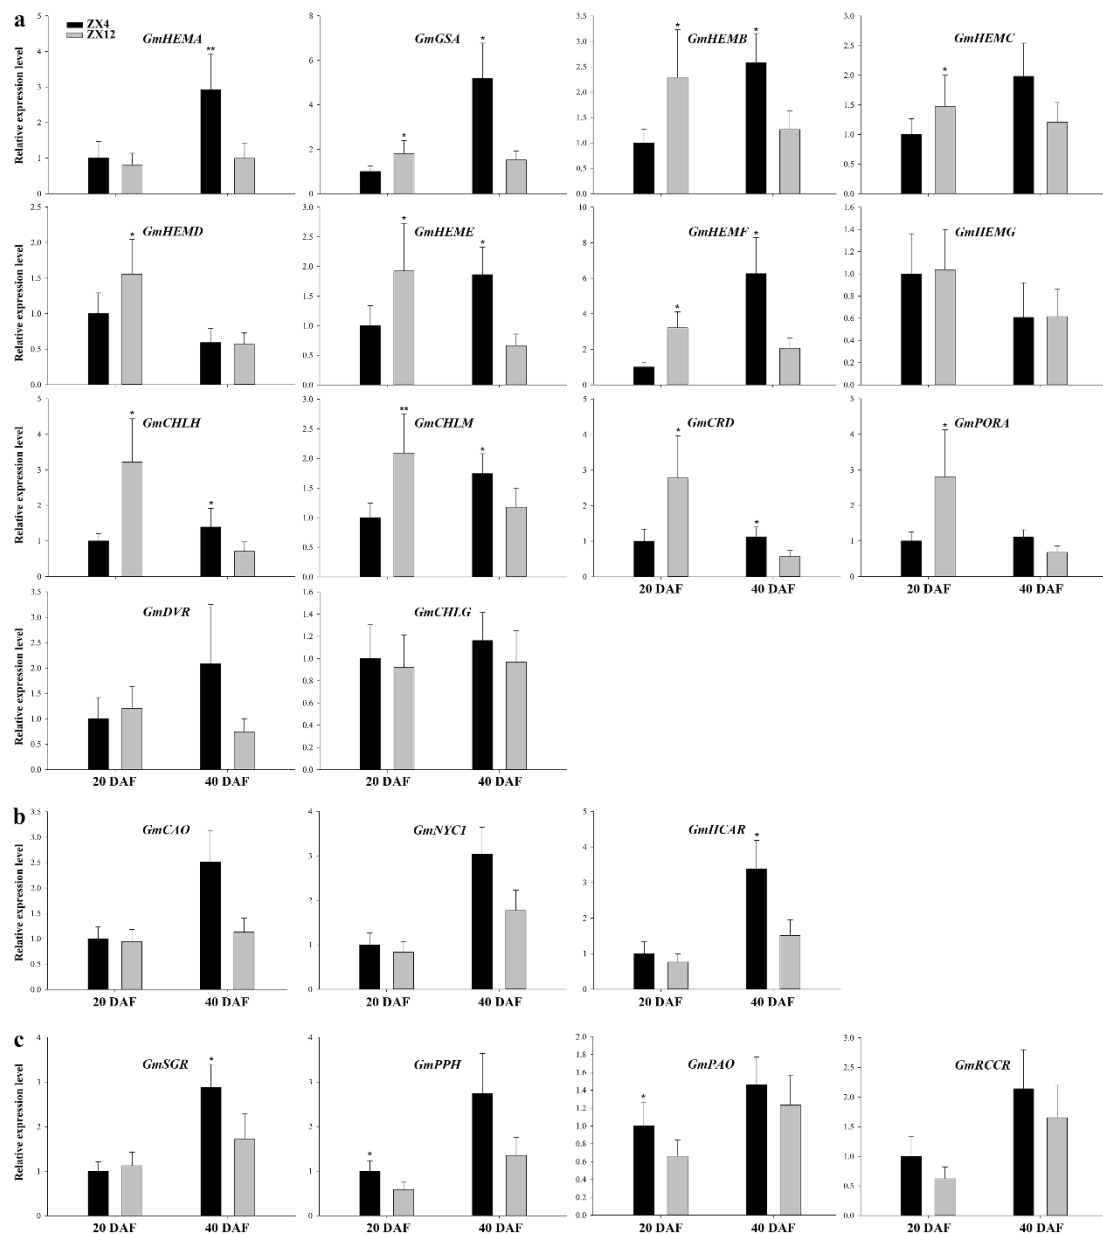

**Fig S3** Expression level of Chl metabolism key genes validated by RT-qPCR in ZX12 and ZX4 seeds at 20 and 40 DAF time. a The expression level of Chl synthesis genes. b The expression level of Chl cycle genes. c The expression level of Chl degradation genes. Values represent the means  $\pm$  SE of three biological replicates. Means with common letters are not significantly different at  $P \leq 0.05$ .

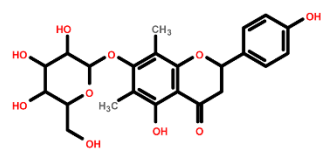

Farrerol-7-O-glucoside

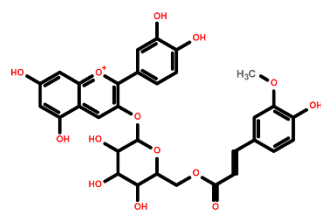

Cyanidin-feruloyl-glucoside

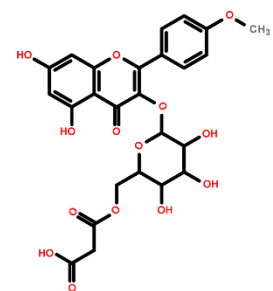

Kaempferide-malonyl-glucoside

**Fig S4** Chemical structures of three flavonoid metabolites unique to ZX12
