# Supplementary material for: Transcriptome and Metabolome Analysis of a Late-Senescent Vegetable Soybean during Seed Development Provides New Insights into Degradation of Chlorophyll
Source: Antioxidants (Basel). 2022 Dec 16;11(12):2480. doi: 10.3390/antiox11122480 (PMC9774520; doi:10.3390/antiox11122480)
Supplement: Supplementary file 1 [file antioxidants-11-02480-s001.zip › Table S1-S2.xlsx]

## Sheet: Table S1
	Table S1. Primers used for qRT-PCR
Gene Name	Accession numbers	Forward primer (5'-3')	Reverse primer (5'-3')	Product length (bp)
GmHEMA	XM_003532537	ATTTCCCTTCCCCAAGACGT	GCGGCTTCTTCGATGTGATT	224
GmGSA	XM_003522541	TGGCCATGACTGCAGGAATA	TAGACACCTTCCGCCAACAT	265
GmHEMB	NM_001251808	AGGGACATGGAGGTTTGTGT	GCACCTTGATTTCAGCACCA	222
GmHEMC	XM_014775781	CACACAACCACTTGCAGACA	AGGAAGCTGCAGTCAAGGAT	200
GmHEMD	XM_006577948	ACTTCCTCTTCCGCTTCGAA	AAATGCTTGCAGTACCAGCC	298
GmHEME	NM_001254630	TGACAGGCGTGGATGTAGTT	ACATTCTCCTCAGGCGTACC	229
GmHEMF	NM_001360354	CTCTTGGACGCATGCATCAA	CTACAGACGCAGCCTAGACA	248
GmHEMG	XM_003535957	CCTCCATTCCCCAACCTCTT	CTTCCCAGAGGTATCCGTCC	290
GmCHLH	XM_028369493	TTGATTCTGATGCCCCTGGT	TGCGTCAAGTCTAACCGTCT	263
GmCHLM	XM_006580569	CAGTGATATCTCCGCCGCTA	GCAATCATCCCATCGGCTTT	201
GmCRD	XM_003521045	AAATTTGTCAGCAGCCCCAG	TGCCTCAAACTCATCCTGGT	240
GmPORA	XM_003540404	AGGCTGCTTCTCTTGTTCCT	AGGCCTAGTCCAGATGAAGC	289
GmDVR	XM_003542869	TGGGAAGGCATTGACTCCAT	TCGGGATCCAGAAGCAACAT	216
GmCHLG	XM_003552213	TGGCCCATTCTTGACAGGAT	ATAAGACAGTAGGGCTCCGC	241
GmCAO	XM_026128879	CTGGGTTTGAAGTGCATGCT	CACTGACTGGTGCTTTGTCC	286
GmNYC1	NM_001358908	GAGTGCAAGCGATCCAAAGT	CCCTGATCATCAAACCAGCG	266
GmHCAR	XM_003535923	GGAGCTCAATGGACTGGGAT	CCACAGAAAAGAAGGCGCTT	239
GmSGR	NM_001364726	ACCAATGCCACACCATCCTA	GTACCACCCTCTCAACTGCT	231
GmPPH	XM_003547931	GGACAATTTGGCGATGGGAA	AGACTTCTCCGGCATTTGGA	247
GmPAO	XM_003538115	CACCACACTCACACTCTCCT	ACCAGTGATCCCTCCAAGTG	266
GmRCCR	NM_001254021	TTCACCTCGTTGCCATCTCT	GGAGTGTGCAAGGAAGAAGC	230
GmEF1b	NM_001249608	CCACTGCTGAAGAAGATGATGATG	AAGGACAGAAGACTTGCCACTC	134

## Sheet: Table S2
Table S2. Mapping statistics of RNA-Seq data
ID	Sample name	Read count	Paired, mapped pairs %	Paired, broken pairs %	Paired, not mapped %	Average read count
ZX4-20d_R1	T01	116936744	92.54	3.95	3.51	1.04901e+08
ZX4-20d_R2	T02	98802380	89.81	7.06	3.13
ZX4-20d_R3	T03	98964616	93.48	3.23	3.3
ZX4-30d_R1	T07	97306126	90.39	6	3.62	9.76214e+07
ZX4-30d_R2	T08	87151816	92.56	3.38	4.06
ZX4-30d_R3	T09	108406334	90.72	5.45	3.83
ZX4-40d_R1	T13	100317150	90.1	5.91	4	107543742
ZX4-40d_R2	T14	92042490	89.66	7.15	3.18
ZX4-40d_R3	T15	130271586	91.32	4.92	3.76
ZX4-50d_R1	T19	105765108	88.83	5.98	5.19	1.09039e+08
ZX4-50d_R2	T20	106225206	90.53	5.44	4.04
ZX4-50d_R3	T21	115125290	89.69	5.47	4.83
ZX12-20d_R1	T22	91167174	90.58	5.55	3.87	8.69049e+07
ZX12-20d_R2	T23	83424664	88	6.94	5.06
ZX12-20d_R3	T24	86122744	88.52	6.54	4.93
ZX12-30d_R1	T28	117811378	82.42	7.01	10.57	1.09033e+08
ZX12-30d_R2	T29	128419310	89.73	6.74	3.53
ZX12-30d_R3	T30	80867092	89.21	7.05	3.73
ZX12-40d_R1	T34	84945890	93.09	4.04	2.87	8.6282e+07
ZX12-40d_R2	T35	80313812	87.22	8.8	3.98
ZX12-40d_R3	T36	93586438	90.27	6.82	2.92
ZX12-50d_R1	T40	85427618	88.85	7.72	3.43	1.07228e+08
ZX12-50d_R2	T41	111036700	89.32	7.59	3.09
ZX12-50d_R3	T42	125219824	83.07	8.91	8.02
